# Supplementary material for: A cytotoxic nitrido-osmium(vi) complex induces caspase-mediated apoptosis in HepG2 cancer cells
Source: Royal Society of Chemistry journal article supplement (doi:10.1039/d0dt02715d), 2020-01-01
Supplement: d0dt02715d1.pdf [file d0dt02715d1.pdf]

## *Supplementary Information*

### **A Cytotoxic Nitrido-osmium(VI) Complex Induces Caspase-mediated Apoptosis in HepG2 Cancer Cells**

Wan-Qiong Huang,<sup>†a</sup> Chuan-Xian Wang,<sup>†a</sup> Tao Liu,<sup>a</sup> Zi-Xin Li,<sup>a</sup> Chen Pan,<sup>a</sup> Yun-Zhou Chen,<sup>b</sup> Xin Lian,<sup>c</sup> Wai-Lun Man<sup>\*b</sup> and Wen-Xiu Ni<sup>\*a</sup>

<sup>a</sup> Department of Medicinal Chemistry, Shantou University Medical College, Shantou, Guangdong, 515041, P. R. China. *E-mail:* [wxni@stu.edu.cn](mailto:wxni@stu.edu.cn); *ORCID:* 0000-0002-2370-6300

<sup>b</sup> Department of Chemistry, Hong Kong Baptist University, Kowloon Tong, Hong Kong, P.R. China. *E-mail:* [wلمان118@hkbu.edu.hk](mailto:wلمان118@hkbu.edu.hk); *ORCID:* 0000-0001-5005-032x

<sup>c</sup> Department of Chemistry, Shantou University Science College, Shantou, Guangdong, 515063, P. R. China.

**Table S1** Crystal data and structure refinement details for **2·1.5CH<sub>2</sub>Cl<sub>2</sub>**

|                                           | <b>2·1.5CH<sub>2</sub>Cl<sub>2</sub></b>                                                      |
|-------------------------------------------|-----------------------------------------------------------------------------------------------|
| Formula                                   | C <sub>39</sub> H <sub>34</sub> Cl <sub>8</sub> N <sub>6</sub> O <sub>4</sub> Os <sub>2</sub> |
| Mr                                        | 1314.72                                                                                       |
| Crystal system                            | Triclinic                                                                                     |
| Space group                               | <i>P</i> -1                                                                                   |
| a/Å                                       | 7.1575(3)                                                                                     |
| b/Å                                       | 12.0799(5)                                                                                    |
| c/Å                                       | 12.5607(5)                                                                                    |
| α (°)                                     | 78.544(3)                                                                                     |
| β (°)                                     | 87.869(3)                                                                                     |
| γ (°)                                     | 84.639(3)                                                                                     |
| V/ Å <sup>3</sup>                         | 1059.54(8)                                                                                    |
| Z                                         | 1                                                                                             |
| ρ <sub>c</sub> /Mg m <sup>-3</sup>        | 2.060                                                                                         |
| F(000)                                    | 630                                                                                           |
| N <sub>ref</sub>                          | 6725                                                                                          |
| Unique refl.                              | 3935                                                                                          |
| Final R indices, I > 2σ(I) R <sub>a</sub> | R1(obs) = 0.0427,<br>wR(all) = 0.1097                                                         |
| GOF                                       | 1.066                                                                                         |
| No. of parameters                         | 335                                                                                           |

**Table S2.** Selected bond lengths (Å) and angles (deg) of complex **2**.

| <b>Bond lengths</b> |            |                  |            |
|---------------------|------------|------------------|------------|
| Os(1)-Cl(1)         | 2.6109(14) | Os(1)-O(1)       | 2.008(4)   |
| Os(1)-O(2)          | 2.024(4)   | Os(1)-N(1)       | 2.110(12)  |
| Os(1)-N(2)          | 2.038(5)   | Os(1)-N(3)       | 1.642(5)   |
| <b>Bond angles</b>  |            |                  |            |
| O(1)-Os(1)-Cl(1)    | 83.33(14)  | N(2)-Os(1)-Cl(1) | 84.46(16)  |
| O(1)-Os(1)-O(2)     | 163.5(2)   | N(2)-Os(1)-N(1)  | 165.2(5)   |
| O(1)-Os(1)-N(1)     | 85.7(4)    | N(3)-Os(1)-Cl(1) | 175.76(19) |
| O(1)-Os(1)-N(2)     | 95.4(2)    | N(3)-Os(1)-O(1)  | 99.2(2)    |
| O(2)-Os(1)-Cl(1)    | 80.45(14)  | N(3)-Os(1)-O(2)  | 97.2(2)    |
| O(2)-Os(1)-N(1)     | 94.7(4)    | N(3)-Os(1)-N(1)  | 95.7(6)    |
| O(2)-Os(1)-N(2)     | 80.10(19)  | N(3)-Os(1)-N(2)  | 98.7(2)    |
| N(1)-Os(1)-Cl(1)    | 81.0(5)    |                  |            |

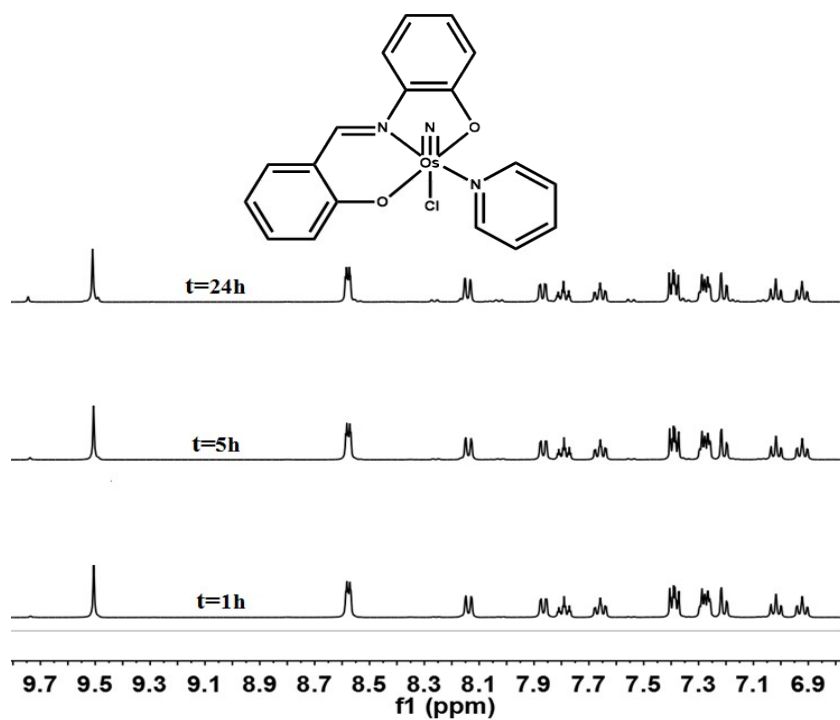

**Figure S1.**  $^1\text{H}$  NMR spectra of **2** ( $d_6$ -DMSO) collected at 1, 5 and 24h.

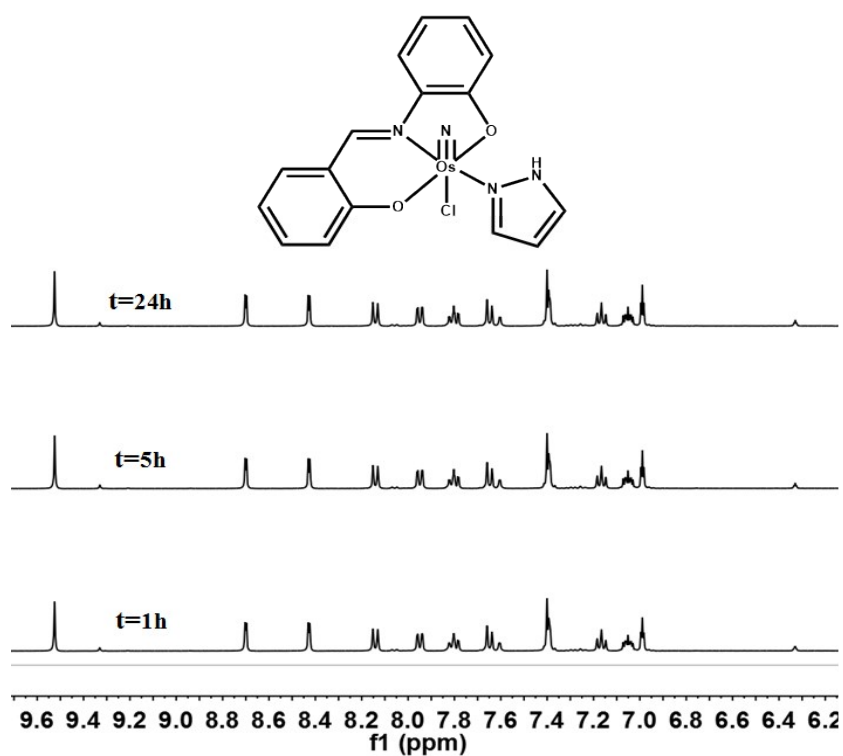

**Figure S2.**  $^1\text{H}$  NMR spectra of **3** ( $d_6$ -DMSO) collected at 1, 5 and 24h.

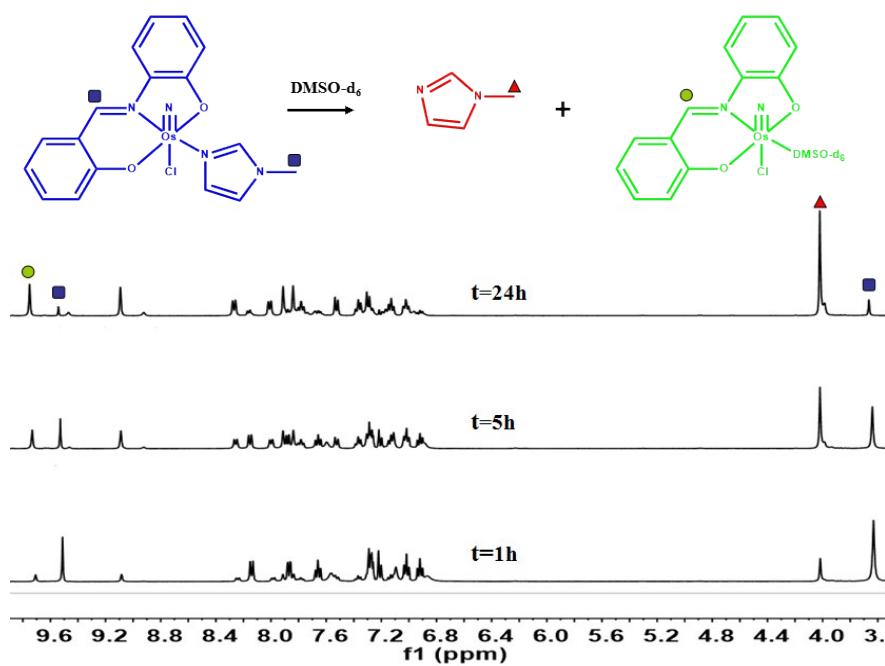

**Figure S3.**  $^1\text{H}$  NMR spectra of **4** ( $\text{d}_6$ -DMSO) collected at 1, 5 and 24h.

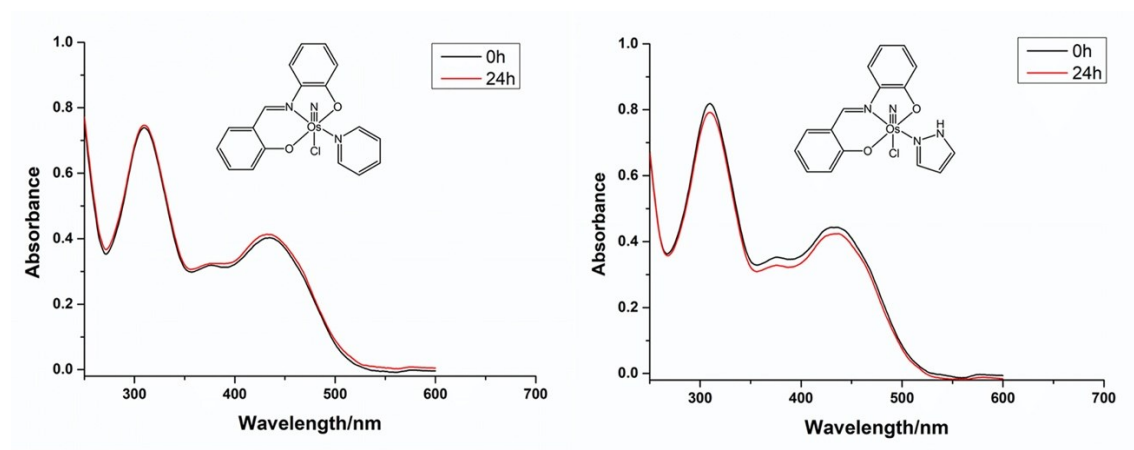

**Figure S4.** UV-Vis spectral changes of 66 $\mu\text{M}$  **2** (left) and **3** (right) in DMSO/PBS (3:1000) taken at 0 and 24h.

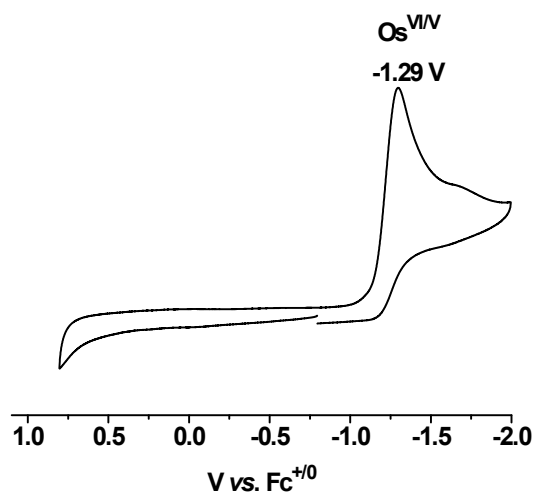

**Figure S5.** Cyclic voltammogram of **2** in CH<sub>3</sub>CN with 0.1M [N<sup>n</sup>Bu<sub>4</sub>](PF<sub>6</sub>) supporting electrolyte.

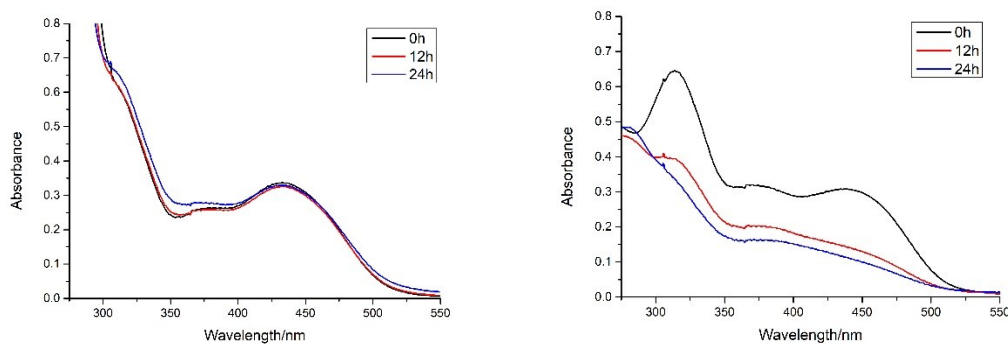

**Figure S6.** UV-vis spectral changes for the reaction of **2** (50 μM) with eight equiv. ascorbic acid (left) and GSH (right) from 0 to 24h.

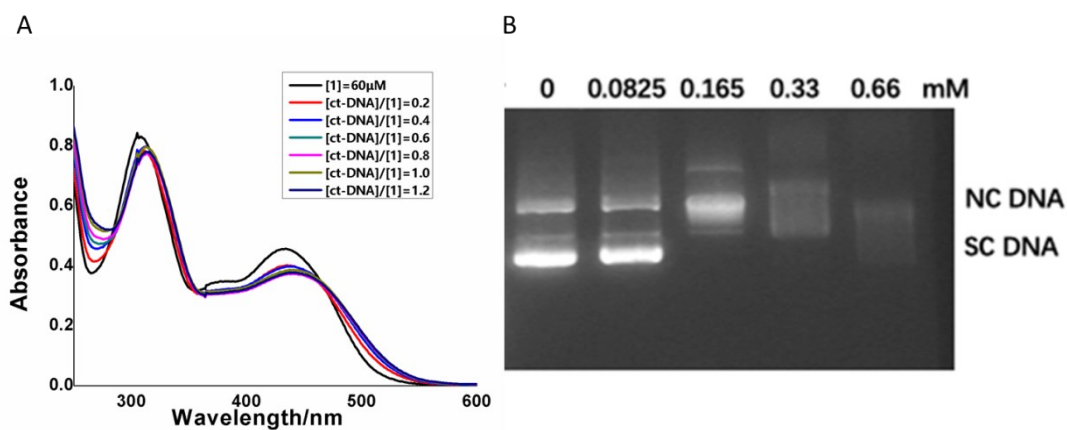

**Figure S7.** (A) UV-Vis spectral change for the reaction of **1** CT-DNA at different [DNA]/[**1**] ratios. (B) Agarose gel electrophoresis study of plasmid DNA pBR322 treated with various concentration of complex **1** for 24 h at 25°C.

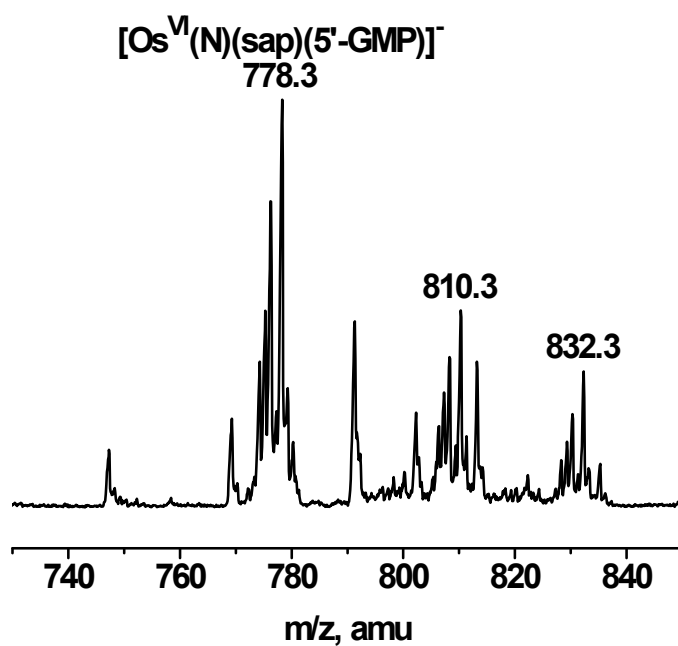

**Figure S8.** ESI mass spectrum for the mixture containing **2** and 5'GMP in MeOH/H<sub>2</sub>O. The two peaks at  $m/z$  810 and 832 are assigned to  $\{[\text{Os}^{\text{VI}}(\text{N})(\text{sap})(5'-\text{GMP})]\cdot\text{MeOH}\}^-$  and  $\{\text{Na}[\text{Os}^{\text{VI}}(\text{N})(\text{sap})(5'-\text{GMP}_{-\text{H}})]\cdot\text{MeOH}\}^-$ , respectively

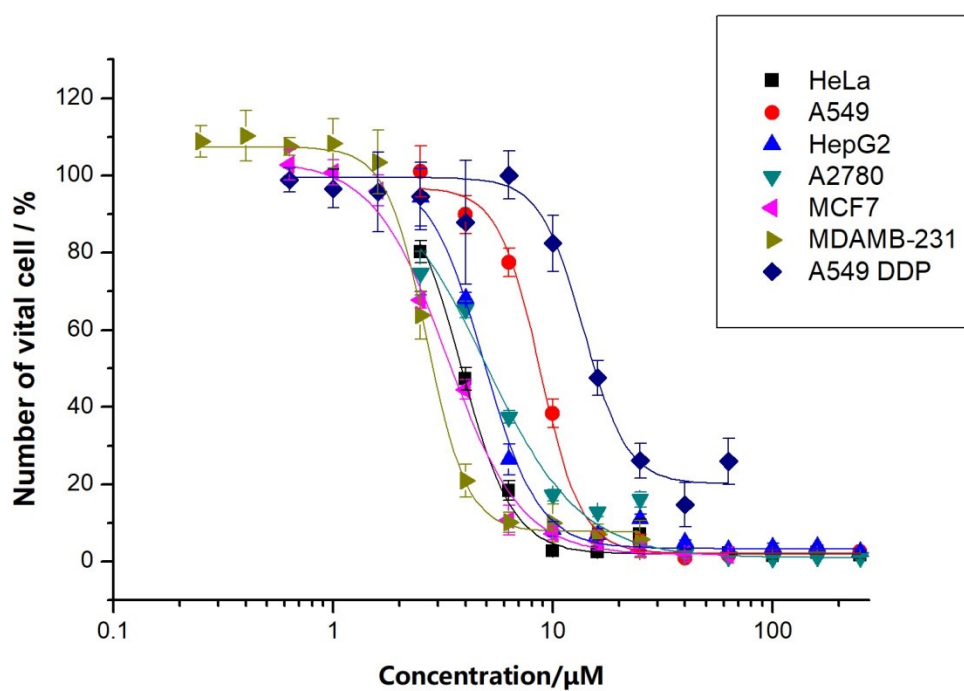

**Figure S9.** The concentration-viability curves of **2** toward seven cell lines for 48h.

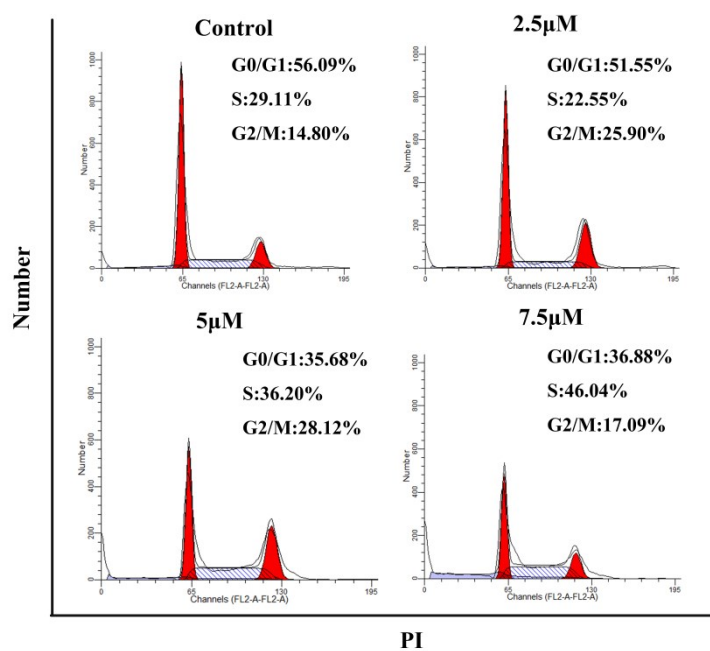

**Figure S10.** Cell cycle detection in HepG2 cells using propidium iodide (PI) staining after treated with compound **2** for 24h.



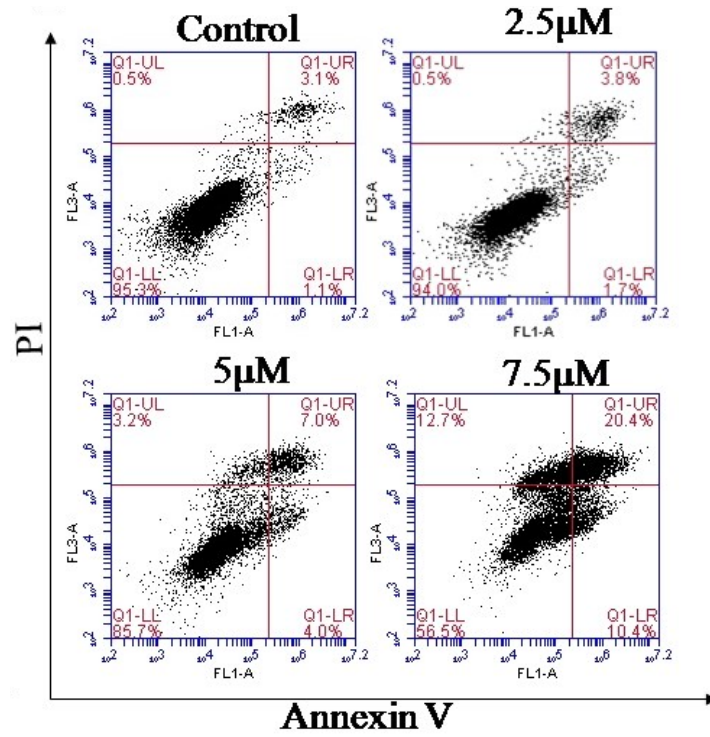

**Figure S11.** Apoptosis detection in HepG2 cells of different [2] after 24 h treatment using annexin V and propidium iodide (PI) double staining.
